# Supplementary material for: Nanosilver-enhanced AIE photosensitizer for simultaneous bioimaging and photodynamic therapy
Source: Royal Society of Chemistry journal article supplement (doi:10.1039/d0qm00469c), 2020-01-01
Supplement: d0qm00469c1.pdf [file d0qm00469c1.pdf]

## Supporting Information

### Nanosilver-enhanced AIE photosensitizer for simultaneous bioimaging and photodynamic therapy

Mohammad Tavakkoli Yaraki<sup>a,b</sup>, Yutong Pan<sup>b,†</sup>, Fang Hu<sup>b,d,†</sup>, Yong Yu<sup>a</sup>, Bin Liu<sup>b,\*</sup>, Yen Nee  
Tan<sup>a,c\*</sup>

<sup>a</sup> Institute of Materials Research and Engineering, Agency for Science, Technology and  
Research (A\*STAR), 138634, Singapore

<sup>b</sup> Department of Chemical and Biomolecular Engineering, National University of Singapore, 4  
Engineering Drive 4, Singapore 117585, Singapore

<sup>c</sup> Faculty of Science, Agriculture & Engineering, Newcastle University, Newcastle Upon Tyne  
NE1 7RU, United Kingdom

<sup>d</sup> Guangdong Provincial Key Laboratory of Construction and Detection in Tissue Engineering,  
Biomaterials Research Center, School of Biomedical Engineering, Southern Medical  
University, Guangzhou 510515, China

<sup>†</sup>Y.P. and F.H. contributed equally to this work.

#### \*Corresponding Authors

**A/Prof. Yen Nee Tan** (Email: [yennee.tan@newcastle.ac.uk](mailto:yennee.tan@newcastle.ac.uk))

**Prof. Bin Liu** (Email: [cheliub@nus.edu.sg](mailto:cheliub@nus.edu.sg))

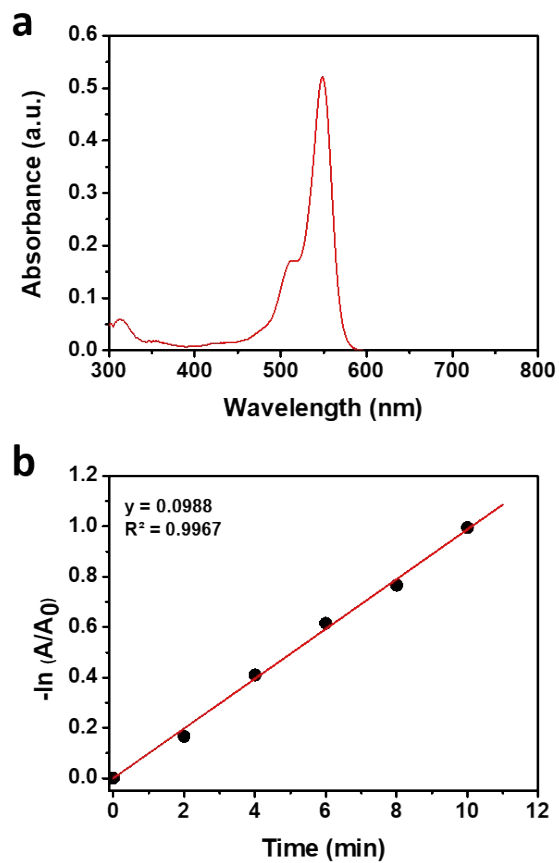

**Figure S1.** Absorbance spectra (a) and kinetic degradation of ABDA (50  $\mu$ M) in the presence of Rose Bengal (5 $\mu$ M) in PBS solution and under continues 40 mW/cm<sup>2</sup> white light irradiation

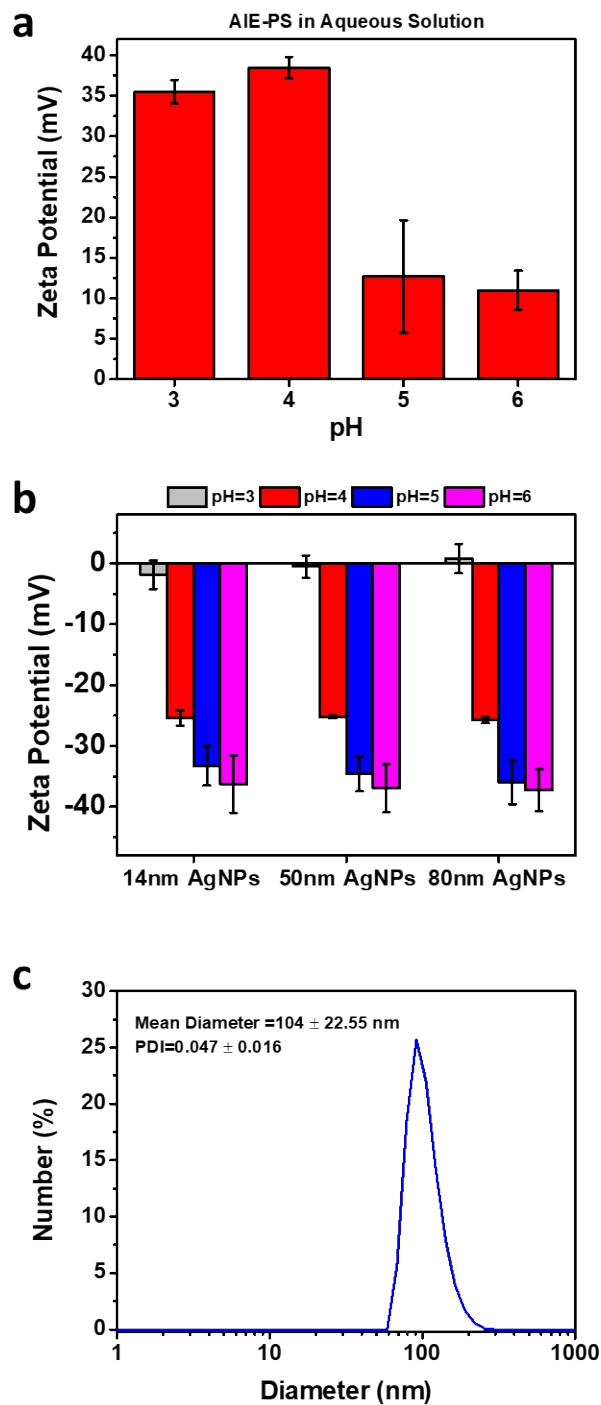

**Figure S2.** a) Zeta potential of AIE-PS solution at different pH, b) Zeta potential of 4-MBA capped AgNPs of different sizes (i.e., 14nm AgNPs , 50nm AgNPs and 80nm AgNPs) at different pH, c) Size distribution of the as-synthesized silica nanoparticles obtained by dynamic light scattering

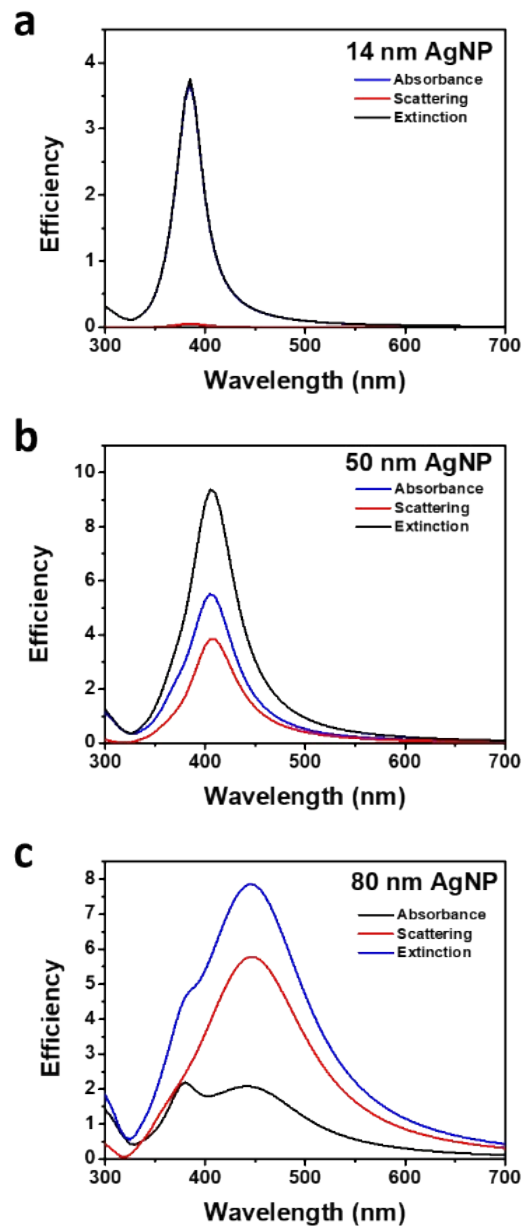

**Figure S3.** The simulated absorbance, light scattering and extinction spectra for a) 14 nm AgNP, b) 50 nm AgNP, and c) 80 nm AgNP, respectively.

### SI-3 Stern-Volmer model:

The AgNPs quench the fluorescence intensity of AIE-PS, following the Stern-Volmer model as defined by the following expression:

$$\frac{F}{F_0} - 1 = K_{SV}[AgNPs] \quad (S1)$$

where  $F$  and  $F_0$  are maximum fluorescence intensity of AIE-PS in the presence and absence of varied AgNPs concentration ( $[AgNPs]$ ). The Stern-Volmer quenching data for AIE-PS in the presence of a) 14nm Ag NPs, b) 50nm Ag NPs, and c) 80nm Ag NPs can be found in **Figure S4**.

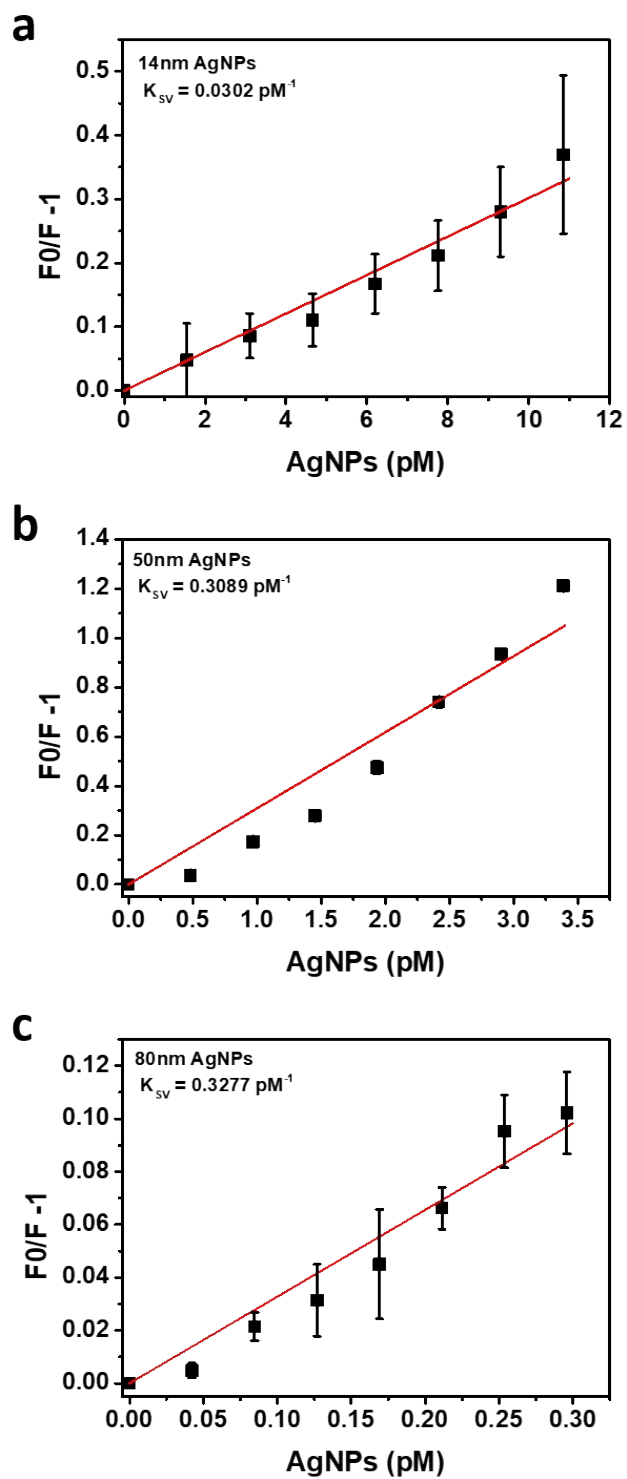

**Figure S4.** Stern-Volmer quenching data for AIE-PS in the presence of a) 14nm AgNPs, b) 50nm AgNPs, and c) 80nm Ag NPs

### SI-5 Nanometal surface energy transfer (NSET) model:

In the NSET model, at a certain distance between the donor and acceptor ( $d_0$ ), the possibility of energy transfer from excited dye molecules to the metallic surface becomes equal to the possibility of spontaneous emission from the dye. This distance ( $d_0$ ) could be defined by the Persson-Lang surface energy equation as below <sup>1</sup>:

$$d_0 = \left( 0.225 \frac{c^3 \varphi_{dye}}{\omega_{dye}^2 \omega_F k_F} \right)^{1/4} \quad (S2)$$

Where  $\varphi_{dye}$  and  $\omega_F$  is fluorescence quantum yield and frequency of electronic transition of the dye, respectively.  $c$  is the speed of light,  $k_F$  and  $\omega_F$  are Fermi wavevector and Fermi frequency of the metal, respectively. In this study, the fluorescence quantum yield data obtained for each hybrid sample (**Figure 4a**) was used as  $\varphi_{dye}$  in the above equation.  $\omega_F$  was about  $3.01 \times 10^{15} \text{ s}^{-1}$  based on the maximum emission wavelength of the AIE-dye (i.e., 625 nm).  $k_F$  and  $\omega_F$  for AgNPs were as  $1.2 \times 10^8 \text{ cm}^{-1}$  and  $8.3 \times 10^{15} \text{ s}^{-1}$ , respectively <sup>2, 3</sup>.

The energy transfer efficiency between the AIE-PS and AgNPs presented in **Figure 3c** was calculated according to the following formula, using the maximum fluorescence intensity of the AIE-PS in the presence ( $F$ ) and absence ( $F_0$ ) of AgNPs:

$$\varphi_{ET} = 1 - \frac{F}{F_0} \quad (S3)$$

Besides, the energy transfer efficiency is a function of the distance between the donor and acceptor using the following equation, where  $n = 4$  for NSET model:

$$\varphi_{ET} = \frac{1}{1 + \left(\frac{R}{d_0}\right)^n} \quad (S4)$$

Hence, the dependencies of the eq. S3 and eq. S4 could be used to describe the experimental fluorescence quenching data obtained for AgNP@AIE-PS hybrid samples. By combining the two above formula and using the experimental results shown in **Figure 3a** and **Figure 3c**, the energy transfer efficiency could be fitted to the NSET model (**Figure 3d**).



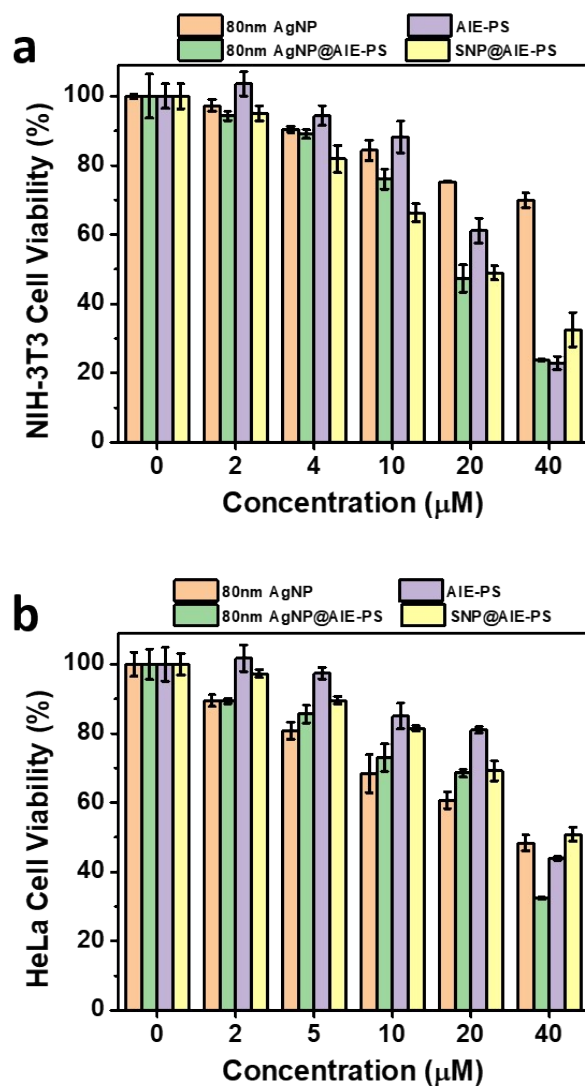

**Figure S5.** Metabolic viability of NIH-3T3 cells (a) and HeLa cells (b) as function of AIE-PS concentration (0-40  $\mu\text{M}$ ), after 24 hr incubation with 80nm AgNP@AIE-PS hybrid (green) , 9  $\mu\text{M}$  AIE-PS alone (purple), SNP@AIE-PS (yellow), and 0.22 pM 80nm AgNPs alone (orange), respectively. For the hybrids, the concentration ratio of 80nm AgNPs (or silica nanoparticles) to AIE-PS was fixed at 0.22 pM/9  $\mu\text{M}$  and 33.4 pM/9  $\mu\text{M}$ , respectively.

## REFERENCES

1. B. Persson and N. Lang, Electron-hole-pair quenching of excited states near a metal, *Phys. Rev. B*, 1982, **26**, 5409.
2. S. Saraswat, A. Desireddy, D. Zheng, L. Guo, H. P. Lu, T. P. Bigioni and D. Isailovic, Energy transfer from fluorescent proteins to metal nanoparticles, *J. Phys. Chem. C*, 2011, **115**, 17587-17593.
3. R. Prajapati, A. Bhattacharya and T. K. Mukherjee, Resonant excitation energy transfer from carbon dots to different sized silver nanoparticles, *Phys. Chem. Chem. Phys.*, 2016, **18**, 28911-28918.
